# Supplementary material
Source: Springer Nature journal article supplement (https://www.springermedizin.de/resource/supplementary/12885_2010_2738_MOESM1_ESM.pdf/9461838)

**A. VIA only strategies**

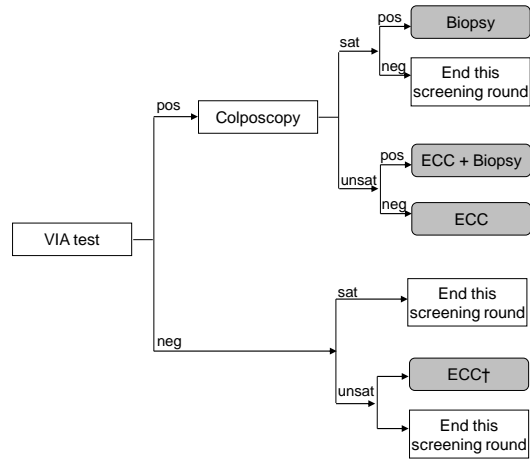

**B. VIA/VILI strategies**

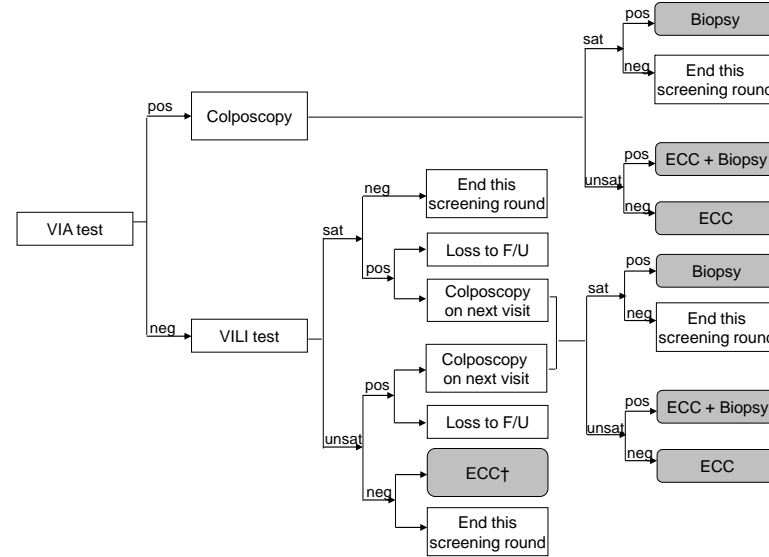

**C. careHPV strategies**

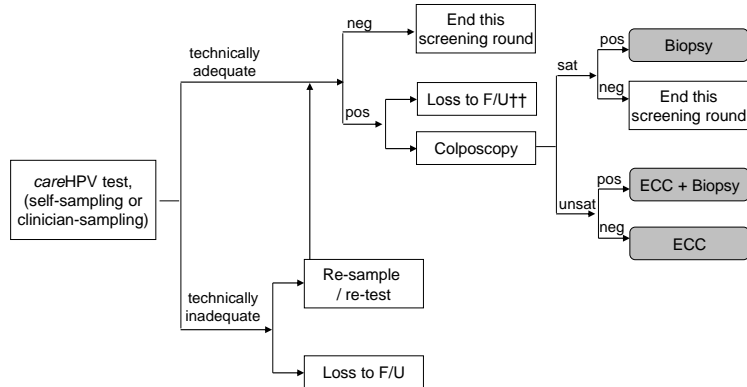

**D. ECC/biopsy and treatment procedures**

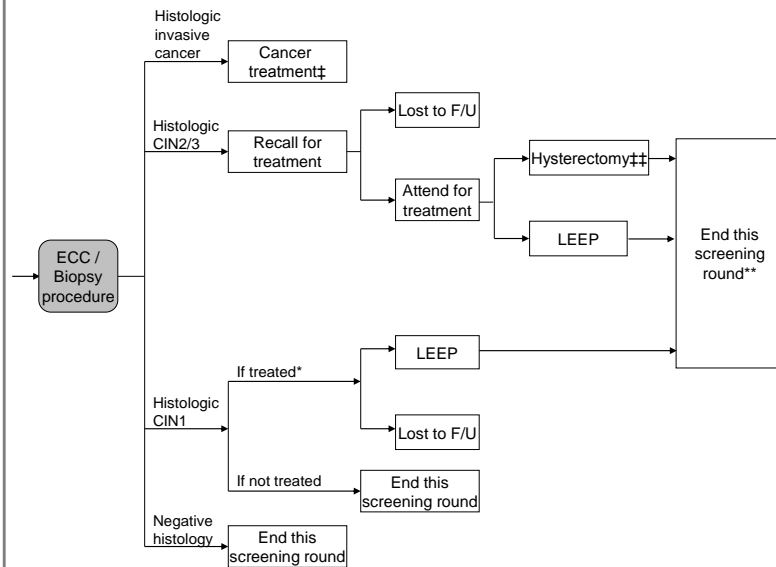

Supplement: MOESM1 [file 9461838]
